# Supplementary material for: Pseudomonas aeruginosa zinc uptake in chelating environment is primarily mediated by the metallophore pseudopaline
Source: PubMed Central journal article supplement (PMC5719457; doi:10.1038/s41598-017-16765-9), 2017-12-07
Supplement: 41598_2017_16765_MOESM1_ESM.pdf [file 41598_2017_16765_MOESM1_ESM.pdf]

1 ***Pseudomonas aeruginosa* zinc uptake in chelating environment is primarily**  
2 **mediated by the metallophore pseudopaline**

3  
4 Sébastien Lhospice<sup>1,§</sup>, Nicolas Oswaldo Gomez<sup>1,§</sup>, Laurent Ouerdane<sup>2,§</sup>, Catherine Brutesco<sup>3</sup>,  
5 Ghassan Ghssein<sup>3</sup>, Christine Hajjar<sup>3</sup>, Ahmed Liratni<sup>1</sup>, Shuanglong Wang<sup>2</sup>, Pierre Richaud<sup>4</sup>,  
6 Sophie Bleves<sup>1</sup>, Geneviève Ball<sup>1</sup>, Elise Borezée-Durant<sup>5</sup>, Ryszard Lobinski<sup>2</sup>, David Pignol<sup>3</sup>,  
7 Pascal Arnoux<sup>3,\*</sup> and Romé Voulhoux<sup>1,\*</sup>

8  
9 <sup>1</sup>CNRS et Aix-Marseille Université, Laboratoire d'Ingénierie des Systèmes  
10 Macromoléculaires (UMR7255), Institut de Microbiologie de la Méditerranée, Marseille,  
11 France.

12 <sup>2</sup>Université de Pau et des Pays de l'Adour/CNRS, Laboratoire de Chimie Analytique Bio-  
13 inorganique et Environnement, IPREM-UMR5254, Hélioparc, 2, Avenue Angot, 64053 Pau,  
14 France.

15 <sup>3</sup>CEA, CNRS and Aix-Marseille Université, Institut de Biosciences et Biotechnologies d'Aix-  
16 Marseille, UMR 7265 LBC, CEA Cadarache, Saint-Paul-lez-Durance F-13108, France.

17 <sup>4</sup>CEA, CNRS and Aix-Marseille Université, Institut de Biosciences et Biotechnologies d'Aix-  
18 Marseille, UMR 7265 LB3M, CEA Cadarache, Saint-Paul-lez Durance F-13108, France.

19 <sup>5</sup>Micalis Institute, INRA, AgroParisTech, Université Paris-Saclay, 78350 Jouy-en-Josas,  
20 France.

21

22

23

24 <sup>§</sup>Contributed equally to this work

25 <sup>\*</sup>Correspondence E-mail: pascal.arnoux@cea.fr and voulhoux@imm.cnrs.fr

26

27 **Supplementary material**  
28 **Supplementary figures and tables**  
29

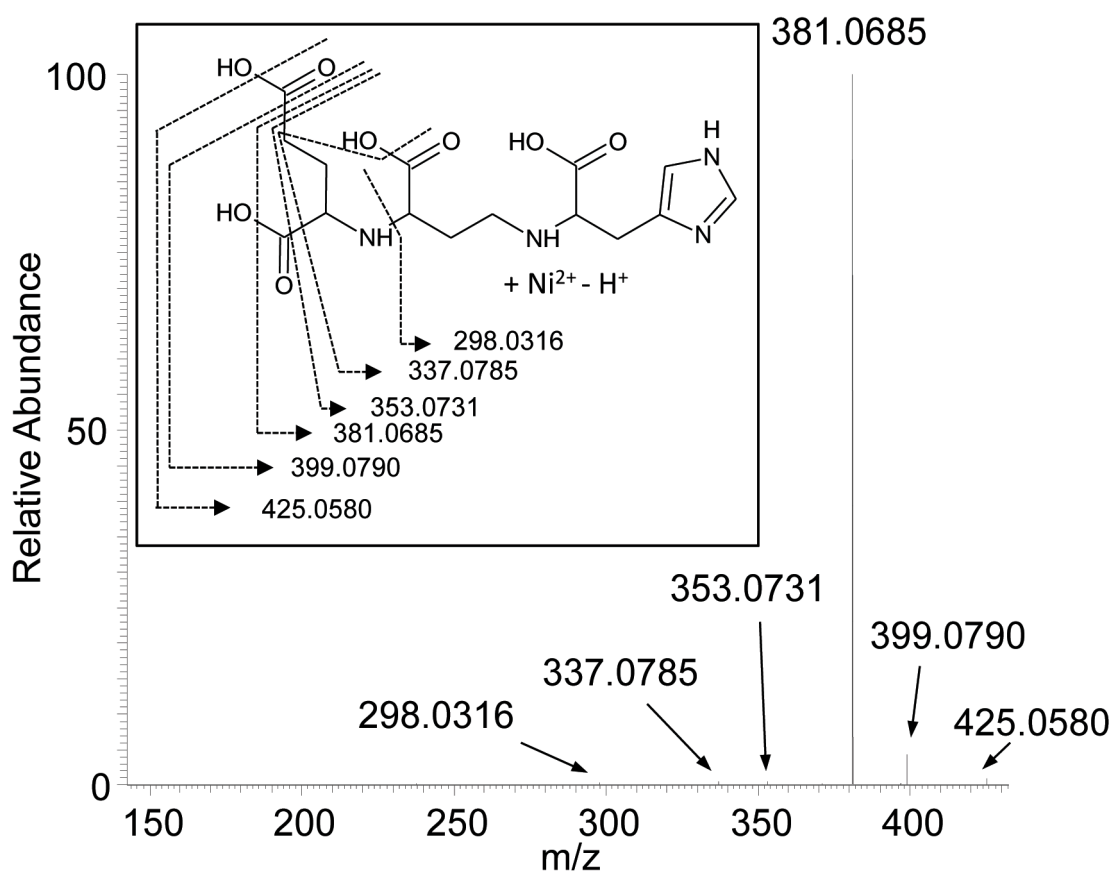

30  
31 **Supplementary Figure 1 | MS/MS fragmentation of Pseudopaline-Ni complex.** The mass  
32 of the ions are indicated as well as their interpretation with the deduced fragmentation scheme  
33 shown in the inset.  
34  
35

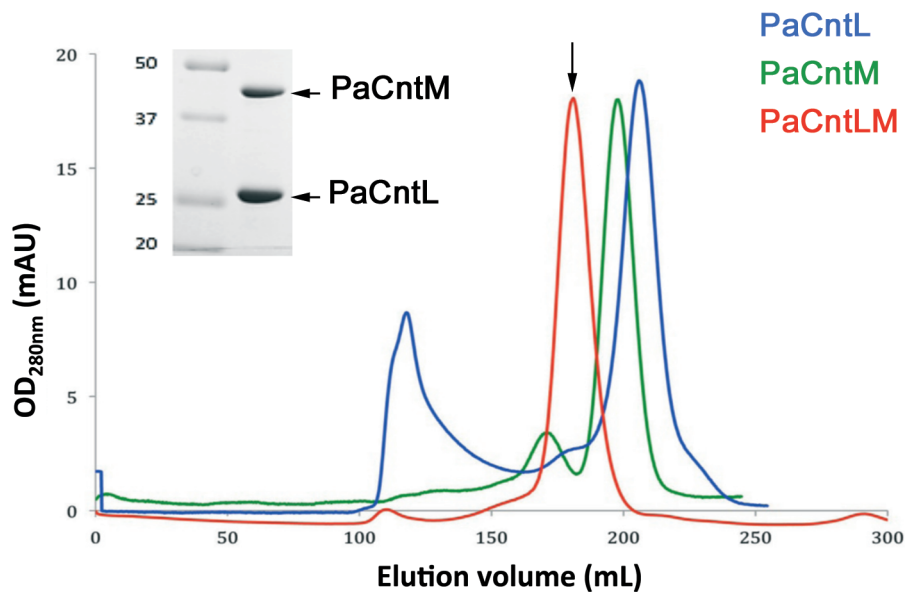

37

38 **Supplementary Figure 2 | Final purification steps of PaCntL, PaCntM and identification**39 **of a complex between PaCntL and PaCntM by gel filtration.** The elution profiles of

40 PaCntL (blue trace) PaCntM (green trace) and a mix of PaCntL and PaCntM (red trace) are

41 shown, with a SDS-PAGE gel using the pic fraction of the PaCntLM elution with molecular

42 weight markers indicated on the left (inset).

43

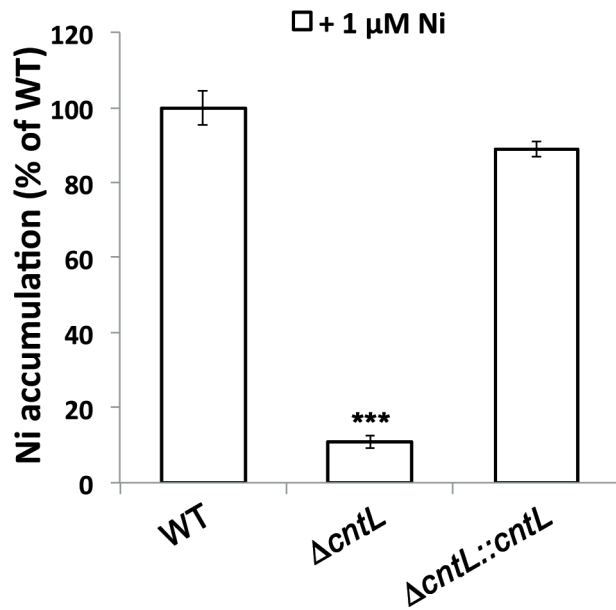

44

45 **Supplementary Figure 3 | Pseudopaline is involved in nickel uptake in minimal media**  
 46 **supplemented with 1 μM nickel.** Intracellular nickel levels were measured by ICP-MS in  
 47 WT,  $\Delta cntL$  and  $\Delta cntL::cntL$  strains grown in MS medium and supplemented with 1 μM of  
 48 nickel. Error bars, mean  $\pm$  s.d. \* $P < 0.05$ , \*\* $P < 0.01$  and \*\*\* $P < 0.001$ .

49

50

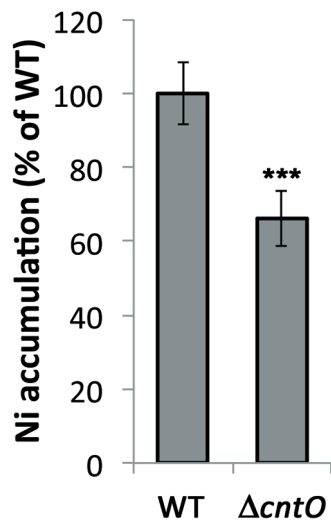

51

52 **Supplementary Figure 4 | Involvement of PaCntO in the import of Ni.** Comparison of the  
53 nickel intracellular accumulation in the WT and  $\Delta cntO$  mutant strains. Error bars, mean  $\pm$  s.d.  
54 \* $P$ <0.05, \*\* $P$ <0.01 and \*\*\* $P$ <0.001.

55

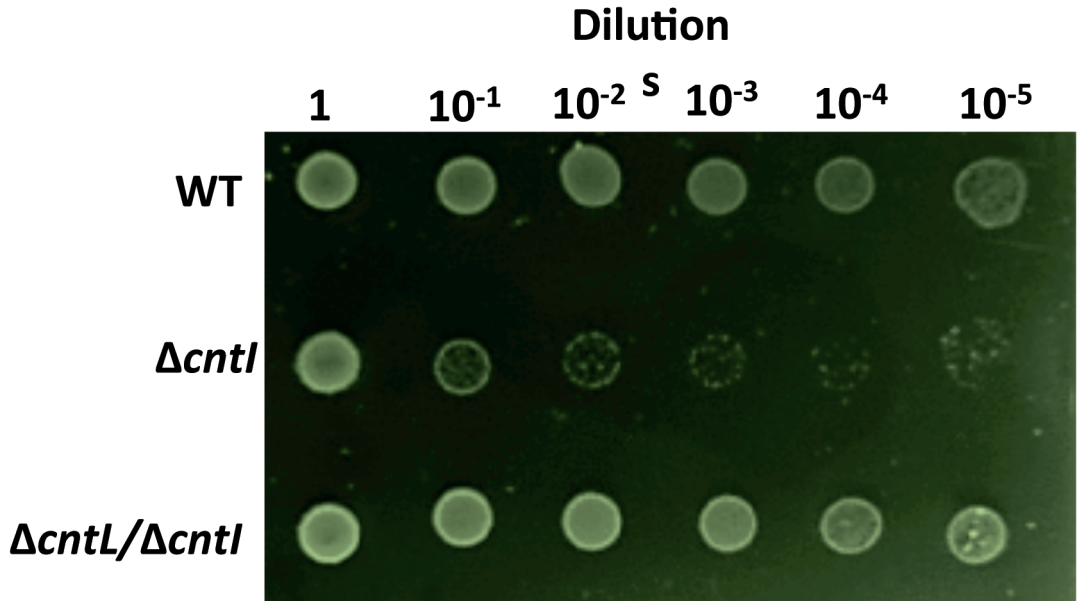

56

57 **Supplementary Figure 5 | Cell viability assay of WT, *ΔcntI* single mutant and**  
 58 ***ΔcntL/ΔcntI* double mutant.** Cell viability was assessed by serial dilutions of PA14 strain  
 59 cultures spotted on MS agar plates.

60

61

62

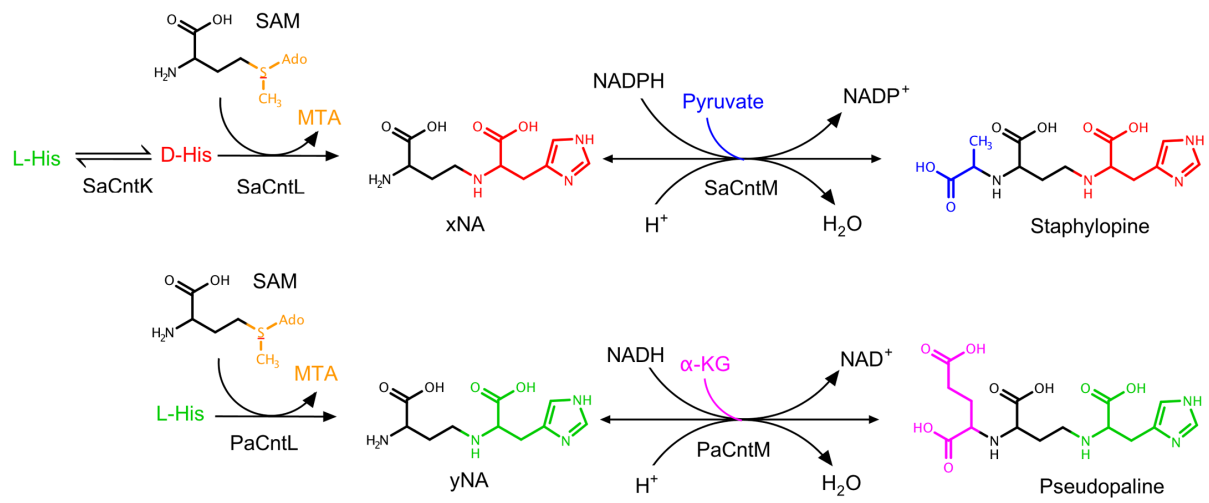

63

64 **Supplementary Figure 6 | Differences in the staphylopine (top) and pseudopaline**  
65 **(bottom) biosynthetic pathways.**

66

67

68

|               | <b>Gene name and locus tag</b> |                    |                    |                    |
|---------------|--------------------------------|--------------------|--------------------|--------------------|
| <b>strain</b> | <b><i>cntO</i></b>             | <b><i>cntL</i></b> | <b><i>cntM</i></b> | <b><i>cntI</i></b> |
| <b>PAO1</b>   | PA4837                         | PA4836             | PA4835             | PA4834             |
| <b>PA14</b>   | PA14_63960                     | PA14_63940         | PA14_63920         | PA14_63910         |
| <b>PA7</b>    | PSPA7_5556                     | PSPA7_5555         | PSPA7_5554         | PSPA7_5553         |

69 **Supplementary Table 1 | correspondence with locus tag in PAO1 and PA14 and PA7**  
70 **strains of *P. aeruginosa*.**

71



|                                                  | <b>description</b>                                                                                                                                                                   | <b>Reference</b>      |
|--------------------------------------------------|--------------------------------------------------------------------------------------------------------------------------------------------------------------------------------------|-----------------------|
| <i>E. coli</i> strains                           |                                                                                                                                                                                      |                       |
| CC118 $\lambda$ pir                              | $\Delta(\text{ara-leu}) \text{ araD } \Delta\text{lacX74 galE galK phoA20 thi-1 rpsE rpoB argE (Am) recA1 RfR } (\lambda\text{pir})$                                                 | 1                     |
| SM10                                             | <i>thi-1, thr, leu, tonA, lacY, supE, recA::RP4-2-Tc::Mu; Km<sup>R</sup></i>                                                                                                         | Laboratory collection |
| BL21                                             | F <sup>-</sup> <i>ompT hsdS<sub>B</sub> (r<sub>B</sub><sup>-</sup>, m<sub>B</sub><sup>-</sup>) gal dcm araB::T7RNAP-tetA</i>                                                         | Laboratory collection |
| <i>P. aeruginosa</i> strains                     |                                                                                                                                                                                      |                       |
| PA14                                             | Wild type                                                                                                                                                                            | 2                     |
| PA14 $\Delta$ cntL                               | <i>cntL (PA14_63940)</i> deletion mutant                                                                                                                                             | This work             |
| PA14 $\Delta$ cntI                               | <i>cntI (PA14_63910)</i> deletion mutant                                                                                                                                             | This work             |
| PA14 $\Delta$ cntO                               | <i>cntO (PA14_63960)</i> deletion mutant                                                                                                                                             | This work             |
| PA14 $\Delta$ cntL:: <i>cntL<sub>V5</sub></i>    | PA14 $\Delta$ cntL strain with <i>cntL<sub>V5</sub></i> allele under the control of the <i>cnt</i> promoter integrated at the <i>attB</i> site (:: <i>cntL<sub>V5</sub></i> )        | This work             |
| PA14 $\Delta$ cntL:: <i>cntL</i>                 | PA14 $\Delta$ cntL strain with <i>cntL</i> allele under the control of the <i>cnt</i> promoter integrated at the <i>attB</i> site (:: <i>cntL</i> )                                  | This work             |
| PA14 $\Delta$ cntL $\Delta$ cntI                 | <i>cntL cntI</i> double deletion strain                                                                                                                                              | This work             |
| PA14 $\text{zur}^-$                              | PA14 strain with transposon insertion in the <i>zur</i> gene PA14_72560 ( <i>zur::Tn</i> or <i>zur</i> <sup>-</sup> ) (mutant ID 42601)                                              | 2                     |
| PA14:: <i>cntL<sub>V5</sub> zur</i> <sup>-</sup> | PA14 $\text{zur}::\text{Tn}$ ( <i>zur</i> <sup>-</sup> ) strain with <i>cntL<sub>V5</sub></i> allele under the control of the <i>cnt</i> promoter integrated at the <i>attB</i> site | This work             |
| Vectors and Plasmids                             |                                                                                                                                                                                      |                       |
| pKNG101                                          | Suicide vector SmR, <i>oriR6K, oriTRK2, mobRK2, sacBR+</i>                                                                                                                           | 1                     |
| pKNG101 $\Delta$ cntL                            | Suicide plasmid for <i>cntL</i> deletion                                                                                                                                             | This work             |
| pKNG101 $\Delta$ cntI                            | Suicide plasmid for <i>cntI</i> deletion                                                                                                                                             | This work             |
| pKNG101 $\Delta$ cntO                            | Suicide plasmid for <i>cntO</i> deletion                                                                                                                                             | This work             |
| Mini-CTX1                                        | vector containing <i>attP</i> site for integration at the <i>attB</i> site of <i>P. aeruginosa</i> chromosome; Tc <sup>R</sup> .                                                     | 3                     |
| Mini-CTX1- <i>cntL<sub>V5</sub></i>              | plasmid harboring <i>cntL<sub>V5</sub></i> under the control of the <i>cnt</i> promoter cloned in <i>EcoRI</i> of Mini-CTX1; Tc <sup>R</sup> .                                       | This work             |
| Mini-CTX1- <i>cntL</i>                           | plasmid harboring <i>cntL</i> under the control of the <i>cnt</i> promoter cloned in <i>EcoRI</i> of Mini-CTX1; Tc <sup>R</sup> .                                                    | This work             |
| pFLP2                                            | plasmid harboring the inducible <i>flp</i> recombinase; ApR (Cb <sup>R</sup> ).                                                                                                      | 3                     |
| pRK2013                                          | Plasmid for triparental mating. Km <sup>R</sup> , ColE1, Tra+ Mob+                                                                                                                   | 4                     |
| pET22b+                                          | Expression plasmid                                                                                                                                                                   | Novagen               |
| pET22b <sup>+</sup> <i>cntL</i>                  | plasmid harboring <i>cntL</i>                                                                                                                                                        | This work             |
| pET-TEV                                          | Expression plasmid                                                                                                                                                                   | Addgene               |
| pET-TEV <i>cntM</i>                              | plasmid harboring <i>cntM</i>                                                                                                                                                        | This work             |

73 **Supplementary Table 2 | Strains and plasmids used in this study.**

| Name  | Sequence (5'-3')                                                                 |
|-------|----------------------------------------------------------------------------------|
| SL1   | CAGGTCGACGGATCCCCGGGGAAAAAGAAGAACGTGCTCACC                                       |
| SL2   | GGCCTTCTCCATGGCATGGCTTCTGGCG                                                     |
| SL3   | GCCATGCCATGGAGAAGGCCGGTCGATGA                                                    |
| SL4   | TATGCATCCGCGGGCCCCGGGAGGTAGACCCTGCGCTTGAC                                        |
| SL7   | GCTTGATATCGAATTCGGCTGGGCTGGTCGT                                                  |
| SL8   | GTAGAGGGCGGGAAATCGCACCAGAAAAG                                                    |
| SL9   | CGATTTCCCGCCCTCTACCGCCGCCAGGA                                                    |
| SL10  | CGGGCTGCAGGAATTCTCACGTAGAATCGAGACCGAGGAGAGGGTTAGGGATAG<br>GCTTACCTCGACCGGCCTTCTC |
| SL12  | CAGGTCGACGGATCCCCGGGGAAATGCAGCGGATCGAG                                           |
| SL13  | GAGGGCTCACATGGGAAATCGCACCAGAA                                                    |
| SL14  | TTTCCCATGTGAGCCCTCTACCGCCGCCA                                                    |
| SL15  | TATGCATCCGCGGGCCCCGGGCCTTTCGTCGATGTCCAG                                          |
| SL19  | CAGGTCGACGGATCCCCGGGTCTACCCGGAGGGACCTATC                                         |
| SL20  | GGAGGCTCACTTCAGCAGGTCGAGCACCA                                                    |
| SL21  | CTGCTGAAGTGAGCCTCCGGCGCGACCGG                                                    |
| SL22  | TATGCATCCGCGGGCCCCGGGGTGTCTACAGCATCTCGAC                                         |
| SL32  | ΓTXΓXTAXTAXΓAΓXΓTTXX                                                             |
| SL33  | GATGTCCAGGCAGCACAAA                                                              |
| SL34b | AACTGGAGAAGCACCTTTGC                                                             |
| SL35b | GACCACGTCCAGGTAAGTCTGTC                                                          |
| SL36  | GATTCATCGATTGCCAAGGA                                                             |
| SL37  | GGAATAGCTGAACGGCTTGA                                                             |
| SL38  | GAGCAGCATGAACAGCATCA                                                             |
| SL39  | GGATGTCCTCGATACGGGTG                                                             |
| SL40  | GCTATATCGGCATCGTCTTCA                                                            |
| SL41  | CATGCTCCAGGAGATCAAGC                                                             |
| SL42  | TCAGTGTGTCGCTTGTCTC                                                              |
| SL43  | GCTTCTTGGTCACCAGGTTC                                                             |
| SL44  | GAGATTCGCCTGCTCACC                                                               |
| SL45  | GATGTCCAGGCAGCACAAA                                                              |
| SL46b | ACCAAGGTGATCGACGAGAC                                                             |
| SL47b | CTCCTTGGCAATCGATGAAT                                                             |
| SL48  | ATCGGTACCCTGCTGATCTA                                                             |
| SL49  | CACCGCCAGGAAGTAGAAGA                                                             |
| SL50  | CGGGCTGCAGGAATTCTCATCGACCGGCCTTCTCCA                                             |

75 **Supplementary Table 3 | Oligonucleotides used in this study.**

77 **Supplementary references**

- 78 1. Kaniga, K., Delor, I. & Cornelis, G. R. A wide-host-range suicide vector for  
79 improving reverse genetics in gram-negative bacteria: inactivation of the blaA gene of  
80 *Yersinia enterocolitica*. *Gene* **109**, 137–141 (1991).
- 81 2. Liberati, N. T. *et al.* An ordered, nonredundant library of *Pseudomonas aeruginosa*  
82 strain PA14 transposon insertion mutants. *Proc. Natl. Acad. Sci. U. S. A.* **103**, 2833–2838  
83 (2006).
- 84 3. Hoang, T. T., Kutchma, A. J., Becher, A. & Schweizer, H. P. Integration-proficient  
85 plasmids for *Pseudomonas aeruginosa*: site-specific integration and use for engineering of  
86 reporter and expression strains. *Plasmid* **43**, 59–72 (2000).
- 87 4. Figurski, D. H. & Helinski, D. R. Replication of an origin-containing derivative of  
88 plasmid RK2 dependent on a plasmid function provided in trans. *Proc. Natl. Acad. Sci. U. S.*  
89 *A.* **76**, 1648–1652 (1979).
- 90
